# Supplementary material for: Dynamic evaluation of metabolic syndrome and its impact on surgical outcomes after Retrograde Intrarenal Surgery (RIRS): an academic single-center retrospective study
Source: Research Square preprint supplement (doi:10.21203/rs.3.rs-8595839/v1), 2026-01-24
Supplement: Supplementary file 1 [file ae235bbac3813ee91385287a.docx]

**
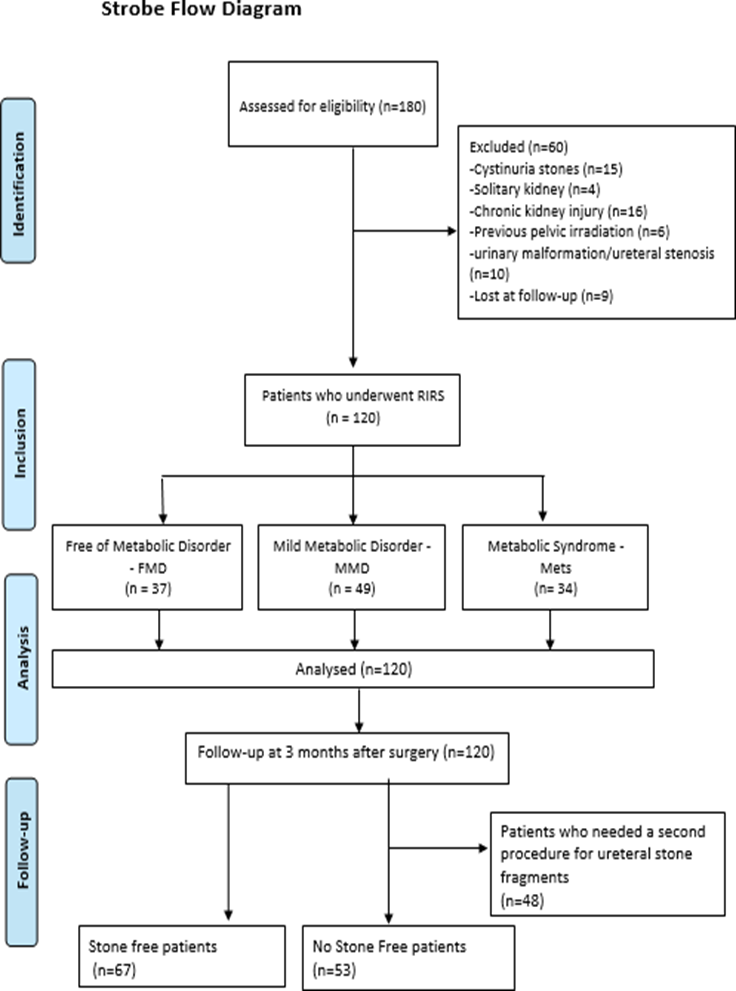
**

**Suppl. Fig. 1 STROBE Flow-chart** STROBE, Strengthening the reporting of observational studies STROBE, Strengthening the reporting of observational studies


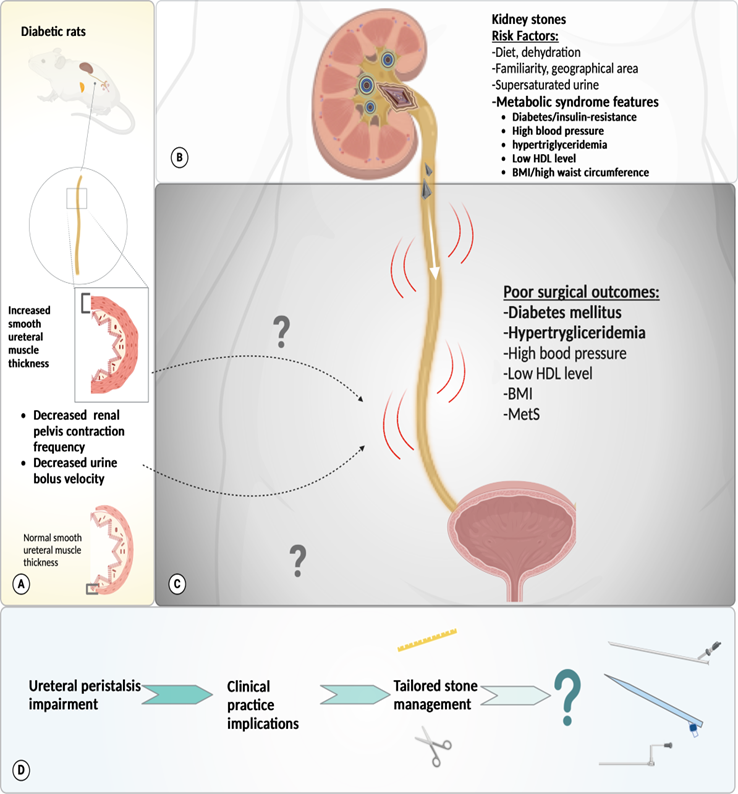


**Suppl. Fig. 2 Comprehensive hypothetical hypothesis on surgical outcomes and future directions to precision medicine. 2A.** Putative ureteral remodelling process in diabetic-induced rats from basic research studies. **2B.** Stone disease formation and already recognized risk factors. **2C**. Metabolic factors investigated concerning surgical outcomes after RIRS. Dotted arrows indicate possible altered mechanisms behind impaired ureteral peristalsis and stone fragment expulsion in humans. **2D**. Practical implications and speculation on individualized stone management *Created with* [*BioRender.com*](http://biorender.com)
